# Supplementary material
Source: PubMed Central journal article supplement (PMC5578808)
Supplement: NIHMS897146-supplement.pdf [file NIHMS897146-supplement.pdf]

## **Inventory of Supplemental Information**

1. Supplemental text
2. Supplemental Figures 1-7
3. Supplemental Table 1
4. Supplemental Table 2

## SUPPLEMENTAL INFORMATION

### SUPPLEMENTAL FIGURE LEGENDS

#### **Figure S1. Samd14-Enh Deletion Does Not Impact Steady-State Levels of Hematopoietic Progenitors *In Vivo*.**

(A) Representative flow cytometric plots of Lin<sup>-</sup>Sca<sup>+</sup>Kit<sup>+</sup> cells, and Lin<sup>-</sup>Sca<sup>-</sup>Kit<sup>+</sup> CMP, GMP and MEP populations in WT and Samd14-Enh<sup>-/-</sup> total bone marrow. (B) Quantitation of flow cytometric analysis of R1-R5 populations using CD71 and Ter119 staining from bone marrow of WT and Samd14-Enh<sup>-/-</sup> mice (n = 3). (C) Quantitation of total cell number (left) and flow cytometric analysis of R1-R5 populations using CD71 and Ter119 staining (right) from WT and Samd14-Enh<sup>-/-</sup> cells isolated from E14.5 fetal liver and expanded *in vitro* for 3 days (n = 3). (D) Allele-specific qRT-PCR analysis of *Gata2* primary transcripts from *Gata2* +9.5<sup>+/-</sup> WT and Mut alleles in control (n = 3) and PHZ-treated (n = 4) spleen. (Related to Figure 1).

**Figure S2. Samd14-Enh Deletion Does Not Alter Expression of Genes Flanking *Samd14*.** Relative expression of *Ppp1r9b* and *Pdk2* in WT and Samd14-Enh<sup>-/-</sup> splenic cells from control and PHZ-treated mice (n = 3). Statistical significance represented by mean +/- SEM.; \*p<0.05. (Related to Figure 3).

**Figure S3. Samd14-Enh<sup>-/-</sup> Mice Have Fewer Splenic Kit<sup>+</sup> Cells Following PHZ Treatment.**

Representative flow cytometric analysis of Ter119<sup>-</sup>CD71<sup>+</sup>Kit<sup>+</sup> cells in WT and Samd14-Enh<sup>-/-</sup> control spleen, and spleen following PHZ treatment. (Related to Figures 4 and 6).

**Figure S4. Analysis of Proliferation and Apoptosis During Anemia in CD71<sup>+</sup>Ter119<sup>-</sup>Kit<sup>+</sup> Splenic Cells.** (A) (left) Representative flow cytometric plot of Ki-67 and 4',6-diamidino-2-phenylindole (DAPI) staining of WT and Samd14-Enh<sup>-/-</sup> PHZ-treated spleen. Gate represents cells in G2/S phase, (2N chromosomal DNA content and Ki67<sup>+</sup>) (right) Quantitation of G2/S cells within the 4 cell populations in the spleen. Cells were bead-sorted to isolate Ter119<sup>+</sup> and Ter119<sup>-</sup> prior to analysis (n = 3). (B) (left) Representative flow cytometric plot of AnnexinV and DRAQ7<sup>TM</sup> staining of WT and Samd14-Enh<sup>-/-</sup> spleen. (right) Quantitation of percentages of live (DRAQ7<sup>-</sup>AnnexinV<sup>-</sup>), early apoptotic (DRAQ7<sup>-</sup>AnnexinV<sup>+</sup>), late apoptotic (DRAQ7<sup>+</sup>AnnexinV<sup>+</sup>), and dead (DRAQ7<sup>+</sup>AnnexinV<sup>-</sup>) cells within the 4 cell populations, distinguished by CD71 and Ter119 staining (n = 3). (C) Representative flow cytometric gating strategy for analysis of apoptosis in Ter119<sup>-</sup>CD71<sup>+</sup>Kit<sup>+</sup> cells in WT and Samd14-Enh<sup>-/-</sup> spleens from vehicle or PHZ-treated mice. (D) Quantitation of percentages of live (DRAQ7<sup>-</sup>AnnexinV<sup>-</sup>), early apoptotic (DRAQ7<sup>-</sup>AnnexinV<sup>+</sup>), late apoptotic (DRAQ7<sup>+</sup>AnnexinV<sup>+</sup>), and dead (DRAQ7<sup>+</sup>AnnexinV<sup>-</sup>) cells within the three c-Kit<sup>+</sup> cell populations in the spleen, distinguished by CD71 and Ter119 staining (n = 3). (Related to Figure 4).

**Figure S5. Samd14-Enh Is Not Required for SCF/c-Kit Signaling in Bone Marrow.**

(A) Flow cytometric analysis of Ter119-depleted WT and Samd14-Enh<sup>-/-</sup> bone marrow cells stained with CD71 and c-Kit. (B) Representative histograms of pAKT and pERK in

CD71<sup>+</sup>Kit<sup>+</sup> WT control and PHZ-treated (top) and *Samd14-Enh*<sup>-/-</sup> (bottom) treated with vehicle or SCF. Histograms were normalized to percentage of maximum cell number. (C) Quantitation of pAKT and pERK MFI in WT and *Samd14-Enh*<sup>-/-</sup> bone marrow cells (n = 3). (Related to Figure 4).

**Figure S6. Occupancy of Components of an E-box-GATA Multiprotein Complex at Anemia-Sensing Enhancers.**

(A) Relative mRNA levels of *Ldb1* and *Lmo2* in FACS-purified CD71<sup>+</sup>Ter119<sup>-</sup>Kit<sup>+</sup> splenic cells from WT control and PHZ-treated mice (n = 3). (B) ChIP-seq of GATA-2 (GSE29193) occupancy in mouse G1E proerythroblast cells (Trompouki et al., 2011), GATA-2 (GSM641911), *Scf*/TAL1 (GSM641910), *Ldb1* (GSM641909) in mouse Lin-hematopoietic progenitors (Li et al., 2011), and *Lmo2* (GSM552237) in HPC-7 cells (Wilson et al., 2010) at indicated sites containing E-box-GATA composite elements (Related to Figure 6).

**Figure S7. Epo Stimulates Expression at Anemia-Regulated Enhancer Loci.** (A) Transcripts Per Million (TPM) at +9.5-like loci in G1E proerythroblast cells (GEO:GSE74371) (Tanimura et al., 2015) (n = 3). (B) Relative mRNA expression at loci containing +9.5-like elements in WT PHZ-treated splenic cells treated with Epo (2U/mL) for 0, 2 or 4 hours (n = 6). Statistical significance represented by mean +/- SEM.; \*\*p<0.01, \*\*\*p<0.001. (Related to Figure 6).

**Table S1. Complete Blood Count Hematologic Parameters of WT and Samd14-Enh<sup>-/-</sup>**

**Animals.** Hematologic parameters (white blood cells (WBC), neutrophils (NE), lymphocytes (LY), monocytes (MO), eosinophils (EO), basophils (BA), red blood cells (RBC), hemoglobin (Hb), hematocrit (HCT), mean corpuscular volume (MCV), mean corpuscular height (MCH), mean corpuscular hemoglobin concentration (MCHC), red cell distribution width (RDW), platelets (PLT) and mean platelet volume (MPV)) from WT (n = 8) and Samd14-Enh<sup>-/-</sup> (n = 10) mice (Related to Figure 1).

**Table S2. List of qRT-PCR Primers Used. (Related to STAR Methods and the Key Resources Table)**

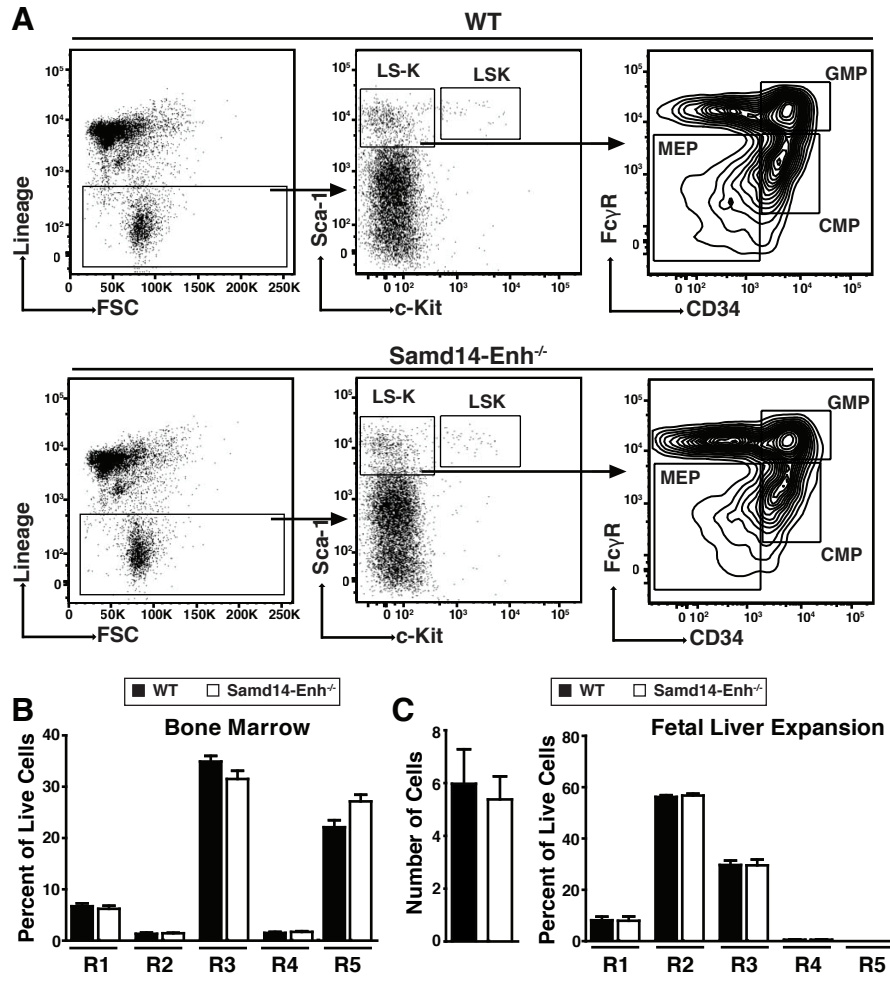

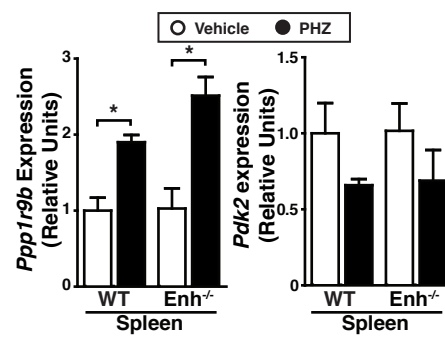

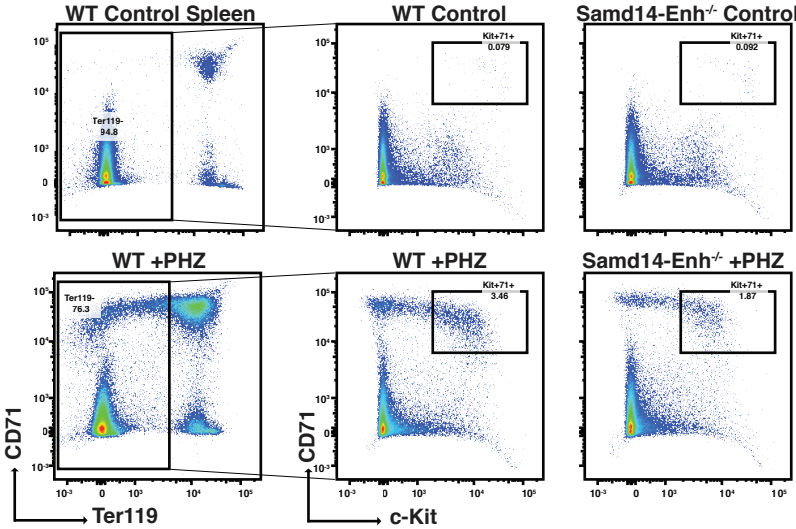



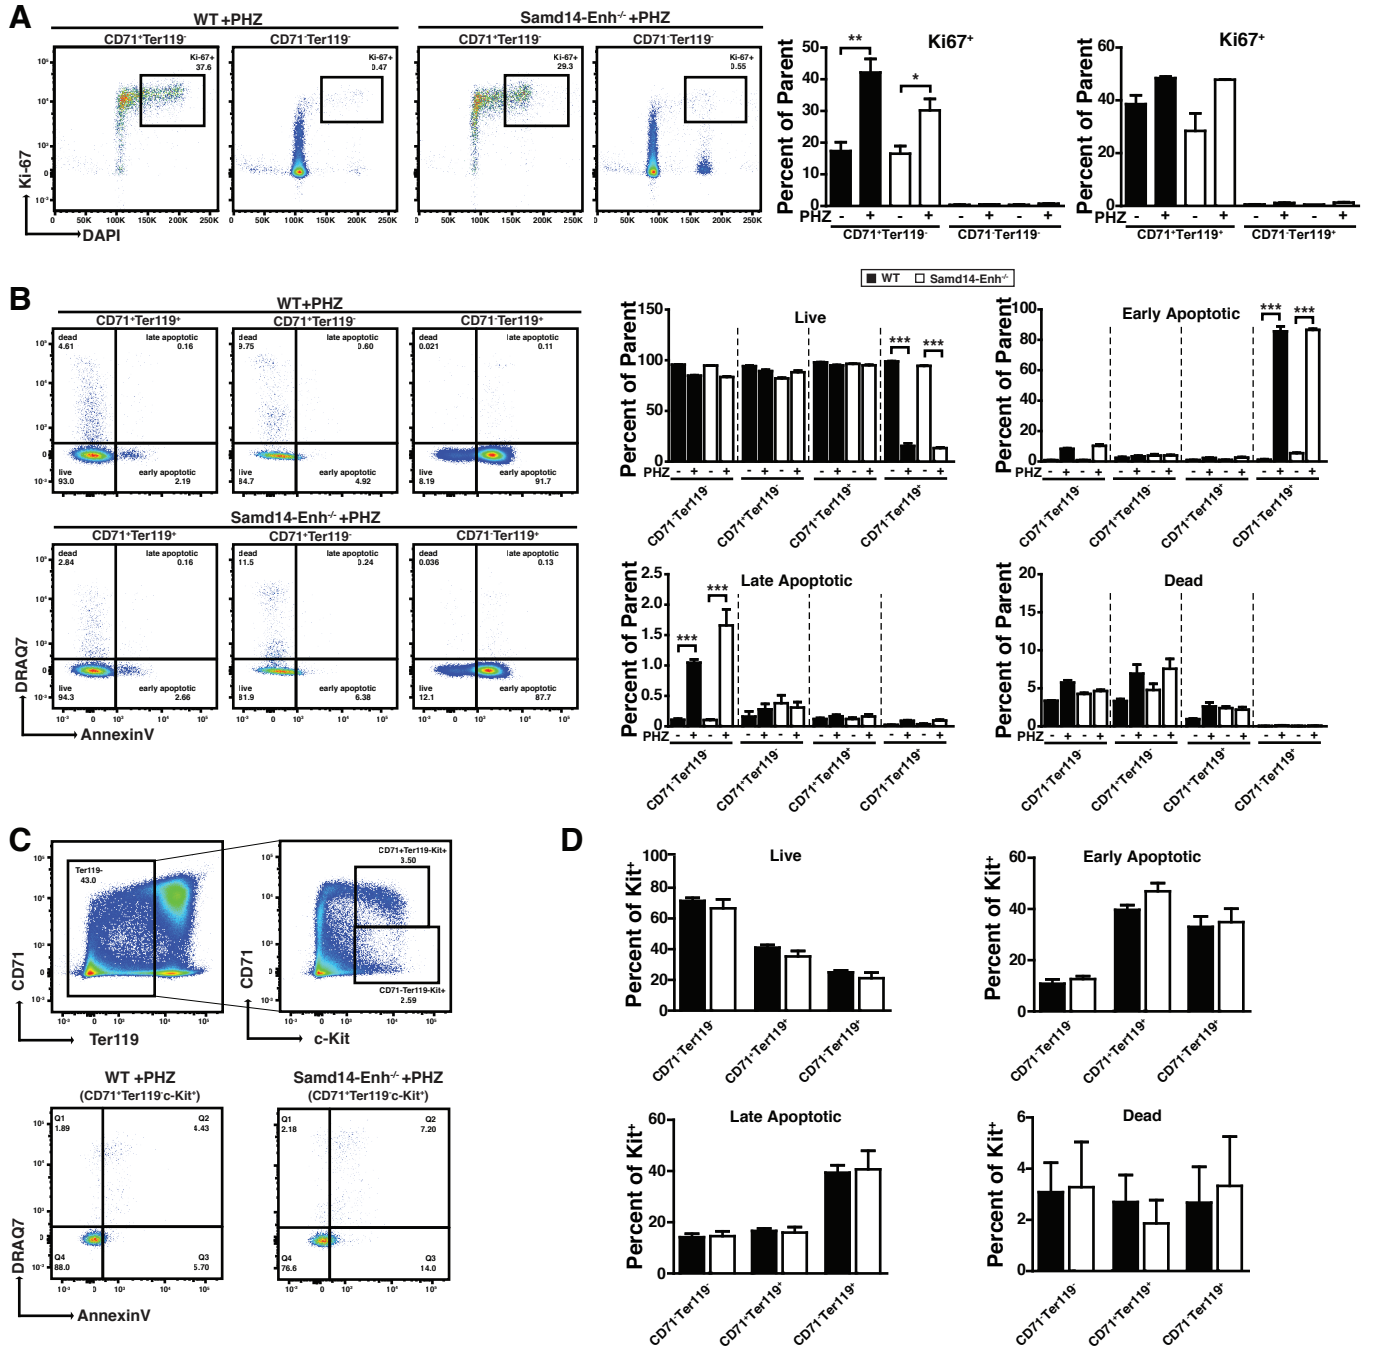

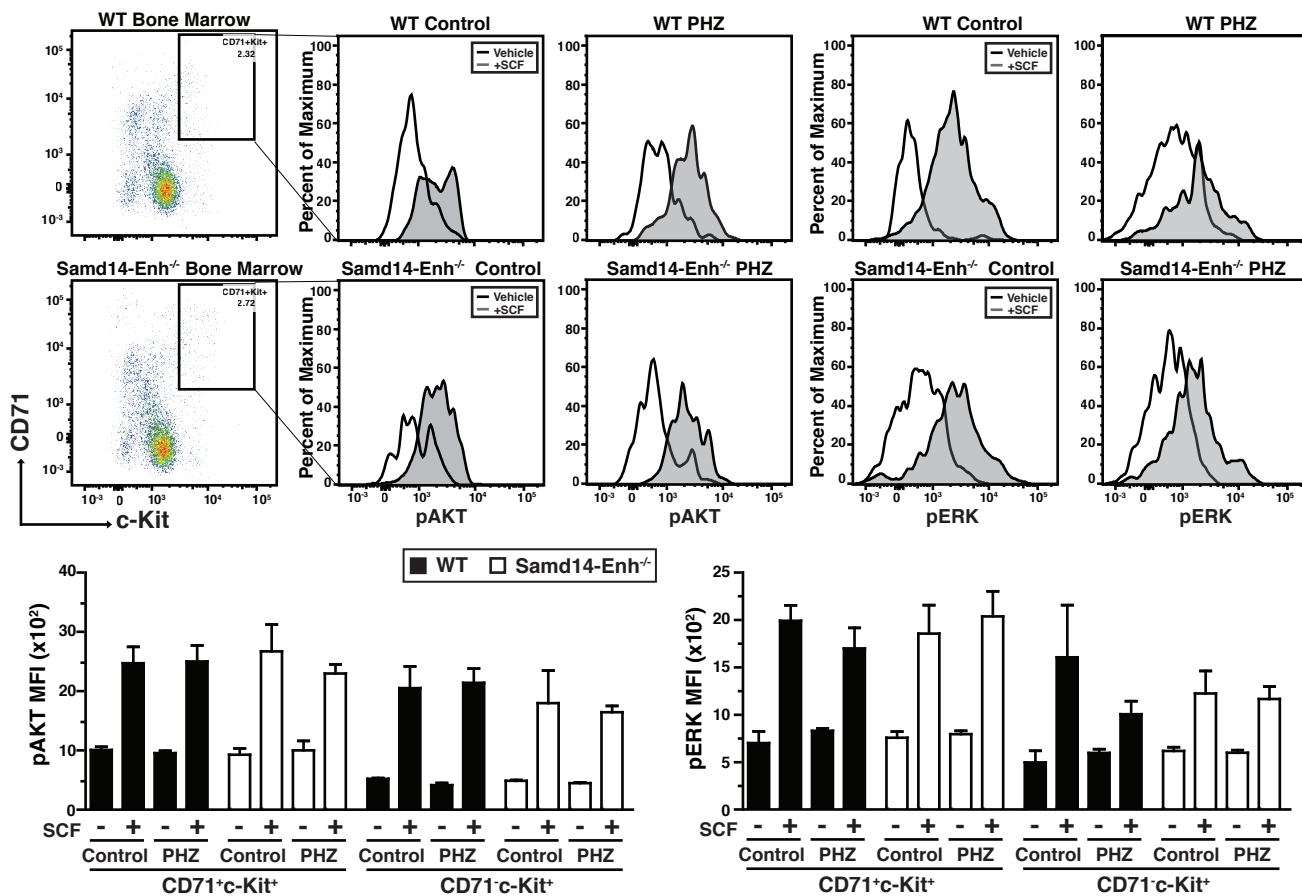

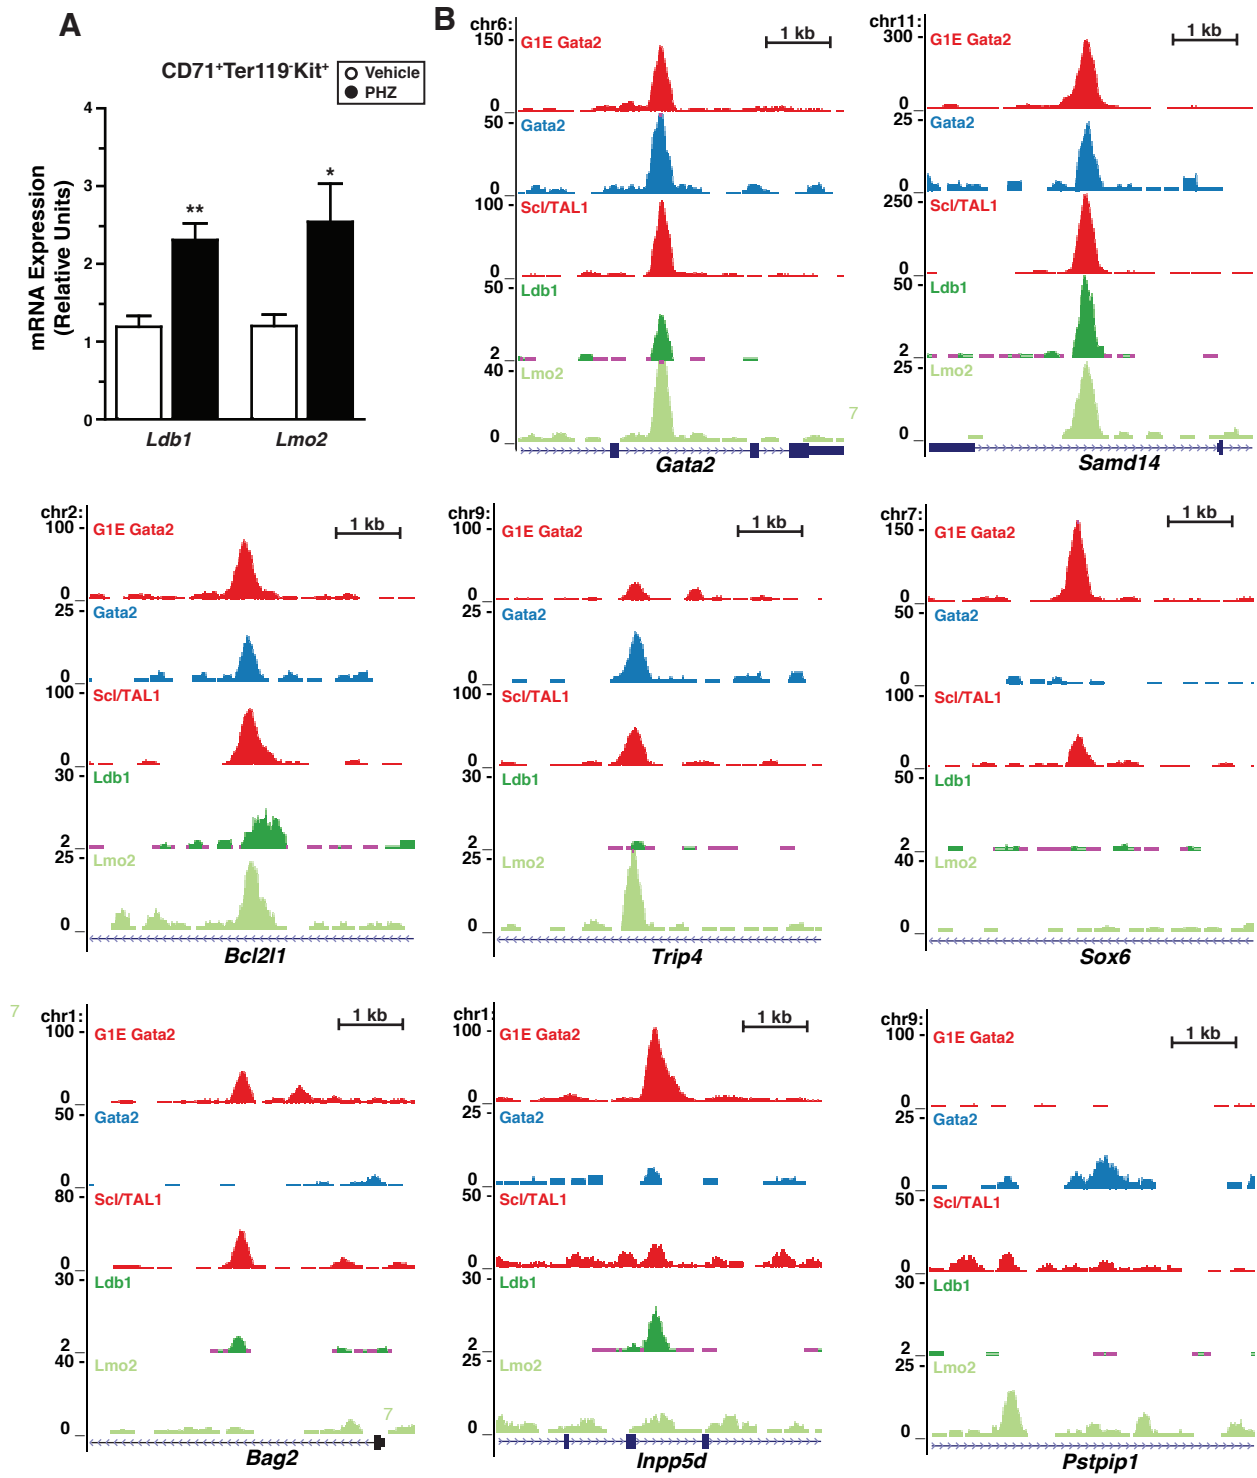

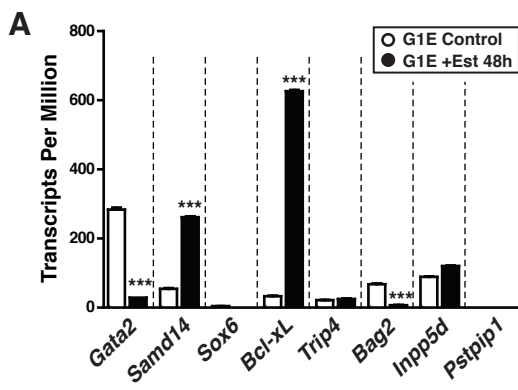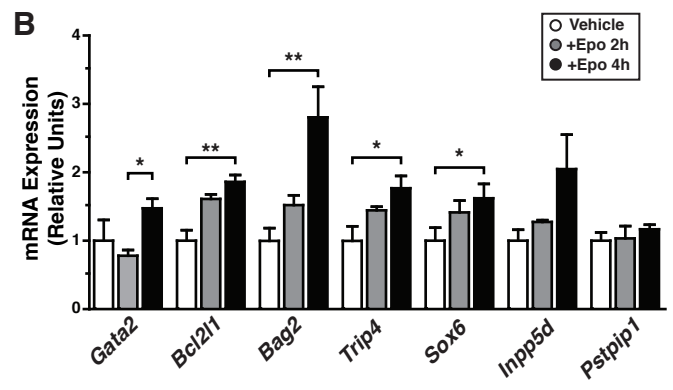

|             | <b>WT (n=8)</b> | <b>Samd14-Enh<sup>-/-</sup><br/>(n=10)</b> | <b>P-<br/>value</b> |
|-------------|-----------------|--------------------------------------------|---------------------|
| <b>WBC</b>  | 11.94 ± 1.053   | 10.17 ± 1.414                              | 0.38                |
| <b>NE</b>   | 2.376 ± 0.330   | 2.139 ± 0.450                              | 0.70                |
| <b>LY</b>   | 8.846 ± 0.633   | 7.520 ± 0.950                              | 0.32                |
| <b>MO</b>   | 0.37 ± 0.075    | 0.2661 ± .28                               | 0.17                |
| <b>EO</b>   | 0.254 ± 0.098   | 0.2 ± 0.067                                | 0.64                |
| <b>BA</b>   | 0.1075 ± 0.041  | 0.05833 ± 0.026                            | 0.31                |
|             |                 |                                            |                     |
| <b>RBC</b>  | 8.696 ± 0.133   | 7.11 ± 0.748                               | 0.09                |
| <b>Hb</b>   | 12.4 ± 0.200    | 10.25 ± 1.052                              | 0.13                |
| <b>HCT</b>  | 43.2 ± 0.766    | 35.1 ± 3.862                               | 0.09                |
| <b>MCV</b>  | 49.66 ± 0.157   | 49.57 ± 0.584                              | 0.90                |
| <b>MCH</b>  | 14.26 ± 0.081   | 14.4 ± 0.191                               | 0.57                |
| <b>MCHC</b> | 28.72 ± 0.198   | 29.09 ± 0.161                              | 0.18                |
| <b>RDW</b>  | 20.02 ± 0.097   | 20.07 ± 0.400                              | 0.92                |
| <b>PLT</b>  | 832.8 ± 33.22   | 753.7 ± 78.250                             | 0.44                |
| <b>MPV</b>  | 4.82 ± 0.102    | 4.771 ± 0.078                              | 0.71                |

| <b>Target</b>                | <b>Forward</b>            | <b>Reverse</b>              |
|------------------------------|---------------------------|-----------------------------|
| <b>Samd14-Enh genotyping</b> | CAGTCTGAAGGGAGGGCAC       | GTCTAAAGCTACTCCAATTCTGAG    |
| <b>18s rRNA</b>              | CGCCGCTAGAGGTGAAATTCT     | CGAACCTCCGACTTTCGTTCT       |
| <b>Samd14 mRNA ex4/5</b>     | GTCGTTACCCTCGAGCAGAG      | ACCCCCAGGTCCAGGAATTT        |
| <b>Samd14_ex1/3</b>          | GACGGATGCTGGAGCTCTCT      | CTGGTGGTCTCTGGTACAGC        |
| <b>Samd14_exon6/7</b>        | GCAGCAGGGAGTCTGTAGAAG     | TCCGTGAACCAGGAAAAGGG        |
| <b>Samd14_intron10</b>       | CACTTTCTTGGCCAGCTCCA      | GTCCACTTAGCACGCCAGAG        |
| <b>Samd14-Mut allele</b>     | CTGAAGGGAGGGCACATAG       | GTCTAAAGCTACTCCAATTCTGAG    |
| <b>Samd14-WT allele</b>      | GATAAAACCCACATAGGAAACC    | GTCTAAAGCTACTCCAATTCTGAG    |
| <b>Ptpn11 mRNA</b>           | AGTGGAGAGAGGGAAGAGCA      | GCCAGACGGTTCTCTCTGTG        |
| <b>Rab1 mRNA</b>             | TGTCCAGCATGAATCCCGAA      | AAGGCAGGACTTTCACACCC        |
| <b>Bcl2l1 mRNA</b>           | GACAAGGAGATGCAGGTATTGG    | TCCCGTAGAGATCCACAAAAGT      |
| <b>Tal1 mRNA</b>             | CGAGCGCTGCTCTATAGCCTT     | TCACCCGGTTGTTGTTGGT         |
| <b>Gata2 mRNA</b>            | GCAGAGAAGCAAGGCTCGC       | CAGTTGACACACTCCCGGC         |
| <b>Gata1 mRNA</b>            | GGCCAAGAAGCGAATGATT       | GGTTCACCTGATGGAGCTTGA       |
| <b>Kit mRNA</b>              | AGCAATGGCCTCACGAGTTCTA    | CCAGGAAAAGTTTGGCAGGAT       |
| <b>Gata2 +9.5 site</b>       | GACATCTGCAGCCGGTAGATAAG   | CATTATTTGCAGAGTGGAGGGTATTAG |
| <b>Gata2 -77 site</b>        | CTTTACCACATCAGGATACAGAGCA | CACCGCACAGCAGTGATAGATAGT    |
| <b>Trip4 mRNA</b>            | GGCAAAAGACCTTCCCCTCA      | TGGAATCCAGTTTCCCTGCTC       |
| <b>SOX6 mRNA</b>             | GGAAAGTCAAGTGAAGATGGAAACT | GTTTAGCTGCAGAGCCATTTCATT    |
| <b>Bag2 mRNA</b>             | CTTCTGCCGCTCGTCTTCCAT     | TCTTTCTCCATCGCTAATCTGCC     |
| <b>Inpp5d mRNA</b>           | GGAGTGTCCGTCCTGGGAG       | AATTCGGAACAGCACGCAG         |
| <b>Pstpip1 mRNA</b>          | CAGGAAGATGTGCAAGGATGTG    | TTCATCTCTGTCTGGCCACCAG      |
| <b>Samd14-Enh-450bp</b>      | GTGTGAGCCAAAGAGGGAAGA     | TGCCCTGTCACTGAACTCT         |
| <b>Samd14-Enh-200bp</b>      | CCTTAGTGACAGGCTCTCA       | TCTCCTATCAGAGTGGCTGCT       |
| <b>Samd14-Enh+200bp</b>      | ATGTTGAGGACCGACCTACC      | AGGGACCCCTTTGCTGTTTT        |
| <b>Samd14-Enh+450bp</b>      | TCCAAGCATCCCTCTAGCCT      | GCTGCTCATGAGGAAAGGGT        |
| <b>Sox6 Intron 2</b>         | CCAGCTCCCCATACACGTC       | GCAGTCCCGACTTTCGTCTAA       |
| <b>Bag2 Intron 2</b>         | CGTGTTCCCTAGGCGAAGTCC     | GTGTCTCTGTGGGAGTTACCG       |
| <b>Bcl2l1 Intron 1</b>       | CTGAGGTCTCCATTTCTC        | CATCTGTAAAGTGAAGATAATGG     |
| <b>Trip4 Intron 11</b>       | CCACAGCCTTGATGCATTGT      | TCTGCCAGCAGCAGATGTAA        |
| <b>Inpp5d +92kb</b>          | TTTCTCCATCTGCCAAGTAGA     | TCATCTCATTTATCTCTCACAACCG   |
| <b>Pstpip1 Intron 1</b>      | AGTTTGGTTCGGGTCTCAGC      | CAAGGCACCAGGGCTTTACT        |
